# Supplementary material for: CdSe-sensitized branched CdS hierarchical nanostructures for efficient photoelectrochemical solar hydrogen generation
Source: Royal Society of Chemistry journal article supplement (doi:10.1039/c6cp00692b), 2016-01-01
Supplement: c6cp00692b1.pdf [file c6cp00692b1.pdf]

## Electronic Supplementary Information

### **CdSe Sensitized Branched CdS Hierarchical Nanostructures for Efficient Photoelectrochemical Solar Hydrogen Generation**

Zonghu Han,<sup>a</sup> Meng Wang,<sup>a</sup> Xiangyan Chen,<sup>a</sup> Shaohua Shen<sup>\*a</sup>

<sup>a</sup> International Research Center for Renewable Energy, State Key Laboratory of  
Multiphase Flow in Power Engineering, Xi'an Jiaotong University, Shaanxi 710049,  
China.

\*Email: shshen\_xjtu@mail.xjtu.edu.cn; Tel: 86-29-82668296; Fax: 86 29 82669033

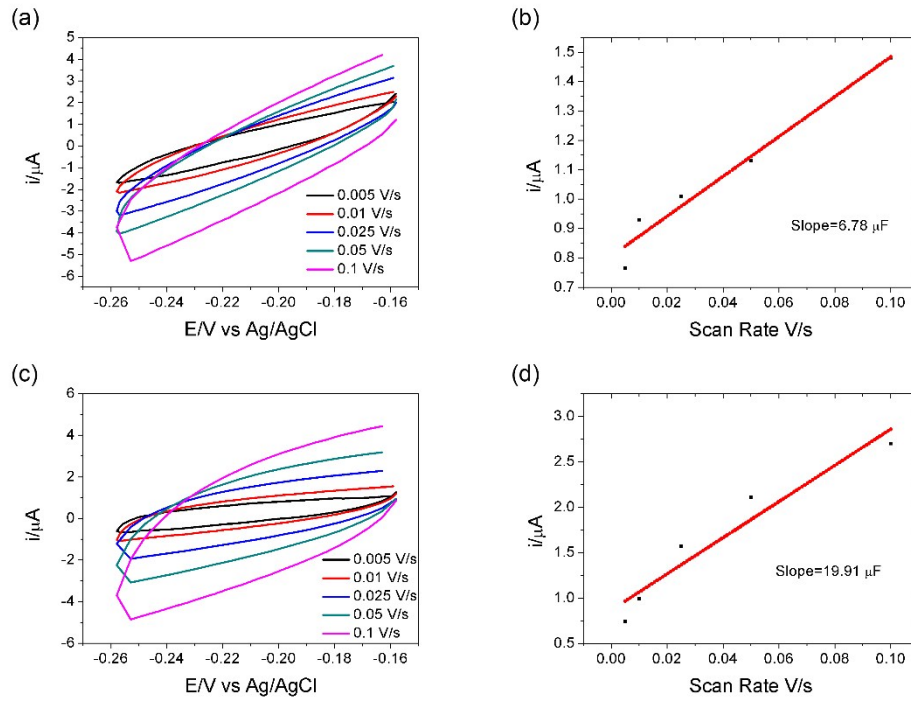

Figure S1. (a) Cyclic voltammograms of rod-like CdS/CdSe-80, which is measured in the 0.1 V potential range at the scan rates of: 0.005, 0.01, 0.025, 0.05 and 0.1 V/s. (b) Anodic charging currents of rod-like CdS/CdSe-80 measured at -0.208 V vs. Ag/AgCl plotted as a function of scan rate. The electrochemical capacitance of rod-like CdS/CdSe-80 is taken as the slope of the least squares fitting line. (c) Cyclic voltammograms of branched CdS/CdSe-80. (d) Anodic charging currents of branched CdS/CdSe-80 measured at -0.208 V vs. Ag/AgCl plotted as a function of scan rate.

Electrochemical active surface area (ECSA) was measured for both CdSe sensitized rod-like and branched CdS nanorod arrays, in which the ECSA were estimated by determining the double layer capacitance from cyclic voltammograms (CV)<sup>1</sup>. Firstly, a non-Faradaic potential range was identified from CV in quiescent solution. This non-Faradaic region is typically a 0.1 V window about open circuit potential (OCP), and all measured currents in this region are assumed to be double-layer charging. According to this assumption, the charging current,  $i$ , is equal to the product of the electrochemical capacitance,  $C_E$ , and the scan rate,  $\nu$ , as shown below<sup>2, 3</sup>:

$$i = \nu C_E \quad \text{\* MERGEFORMAT (1)}$$

Plotting  $i$  as a function of  $\nu$  yields a straight line with slope equal to  $C_E$ . The ECSA of the catalyst can be calculated by dividing  $C_E$  by the specific capacitance ( $C_S$ ) of the sample as shown in equation\\* MERGEFORMAT (2).<sup>1</sup>

$$ECSA = \frac{C_E}{C_S} \quad \text{\* MERGEFORMAT (2)}$$

We applied this measurement in rod-like CdS/CdSe-80 and branched CdS/CdSe-80 films. CV measurements were carried out in a convenient three electrodes cell containing aqueous solution of Na<sub>2</sub>SO<sub>3</sub> (0.5 M) as the electrolyte. The obtained CdS/CdSe-A films as working electrodes were mounted onto a special designed electrode holder. The surface areas exposed to electrolyte were fixed at 0.785 cm<sup>2</sup>. An Ag/AgCl electrode was used as a reference electrode and a large area platinum plate was used as a counter electrode.

OCP was measured in the dark condition, and then 0.1 V window centered at OCP was utilized as the potential range in subsequent CV measurements (Figure S1a and S1c). For the present system, the measured OCP was -0.208 V. Therefore, the potential range for CV measurement was determined from -0.158 V to -0.258 V. Scan rates of 0.005, 0.01, 0.025, 0.05 and 0.1 V/s were conducted, and the anodic charging currents measured at -0.208 V vs. Ag/AgCl were plotted as a function of scan rate (Figure S1b and S1d). As described in equation (1), the slopes in Figure S1b and S1d equal to the electrochemical capacitances of CdS/CdSe-80 and branched CdS/CdSe-80, which were 6.78 μF and 19.91 μF, respectively. Moreover, the specific capacitance,  $C_S$ , is usually a constant for a specific system<sup>4</sup>, therefore the ECSA is proportional to  $C_E$ , suggesting the ECSA of branched CdS/CdSe-80 is nearly 3 times than that of rod-like CdS/CdSe-80.

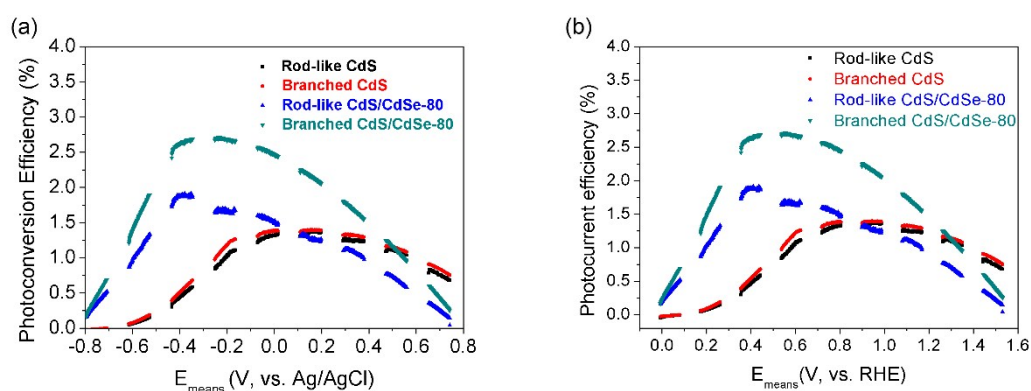

Figure S2. (a) Photo-conversion efficiencies of rod-like CdS, branched CdS, rod-like CdS/CdSe-80 and branched CdS/CdSe-80 films based on the reference potential of Ag/AgCl. (b) Photo-conversion efficiencies of rod-like CdS, branched CdS, rod-like CdS/CdSe-80 and branched CdS/CdSe-80 films based on the reference potential of RHE.

Table S1. The calculated values of  $E_{app}$ ,  $E_{means}$ ,  $E_{aoc}$ , Currents and Efficiencies of selected samples.

| <i>Samples</i>              | $E_{means}/V$ | $E_{aoc}/V$ | $E_{app}/V$ | <i>Current</i> / $mA \cdot cm^{-2}$ | <i>Efficiency</i> |
|-----------------------------|---------------|-------------|-------------|-------------------------------------|-------------------|
| <i>Rod-like CdS</i>         | -0.75         | -0.186      | -0.564      | -0.0279                             | -0.01858          |
|                             | -0.55         |             | -0.364      | 0.1386                              | 0.12003           |
|                             | -0.35         |             | -0.164      | 0.54076                             | 0.57645           |
|                             | -0.245        |             | -0.059      | 0.74917                             | 0.87728           |
|                             | -0.05         |             | 0.136       | 1.16076                             | 1.26988           |
|                             | 0.15          |             | 0.336       | 1.52866                             | 1.36662           |
|                             | 0.35          |             | 0.536       | 1.79108                             | 1.24301           |
|                             | 0.55          |             | 0.736       | 2.13758                             | 1.05596           |
|                             | 0.74          |             | 0.926       | 2.23567                             | 0.67964           |
| <i>Branched CdS</i>         | -0.75         | -0.186      | -0.564      | -0.0214                             | -0.01425          |
|                             | -0.55         |             | -0.364      | 0.17045                             | 0.14761           |
|                             | -0.35         |             | -0.164      | 0.62624                             | 0.66757           |
|                             | -0.245        |             | -0.059      | 0.8665                              | 1.01467           |
|                             | -0.05         |             | 0.136       | 1.2293                              | 1.34485           |
|                             | 0.15          |             | 0.336       | 1.55669                             | 1.39168           |
|                             | 0.35          |             | 0.536       | 1.89299                             | 1.31374           |
|                             | 0.55          |             | 0.736       | 2.22166                             | 1.0975            |
|                             | 0.74          |             | 0.926       | 2.48917                             | 0.75671           |
| <i>Rod-like CdS/CdSe-80</i> | -0.75         | -0.429      | -0.32111    | 0.40395                             | 0.36715           |
|                             | -0.55         |             | -0.12111    | 1.11083                             | 1.23179           |
|                             | -0.35         |             | 0.07889     | 1.63057                             | 1.87697           |
|                             | -0.245        |             | 0.18389     | 1.58981                             | 1.66312           |
|                             | -0.05         |             | 0.37889     | 1.83949                             | 1.56561           |
|                             | 0.15          |             | 0.57889     | 1.9414                              | 1.26407           |
|                             | 0.35          |             | 0.77889     | 2.3414                              | 1.05623           |
|                             | 0.55          |             | 0.97889     | 2.43567                             | 0.61162           |
|                             | 0.74          |             | 1.16889     | 2.48408                             | 0.1518            |
| <i>Branched CdS/CdSe-80</i> | -0.75         | -0.429      | -0.32111    | 0.49287                             | 0.44796           |
|                             | -0.55         |             | -0.12111    | 1.56561                             | 1.73608           |
|                             | -0.35         |             | 0.07889     | 2.32611                             | 2.67761           |
|                             | -0.245        |             | 0.18389     | 2.58726                             | 2.70656           |
|                             | -0.05         |             | 0.37889     | 2.97452                             | 2.53165           |
|                             | 0.15          |             | 0.57889     | 3.32611                             | 2.16567           |
|                             | 0.35          |             | 0.77889     | 3.63439                             | 1.63951           |
|                             | 0.55          |             | 0.97889     | 3.92484                             | 0.98557           |
|                             | 0.74          |             | 1.16889     | 4.27006                             | 0.26094           |

Reference:

1. C. C. McCrory, S. Jung, I. M. Ferrer, S. M. Chatman, J. C. Peters and T. F. Jaramillo, *Journal of the American Chemical Society*, 2015, **137**, 4347-4357.
2. S. Trasatti and O. Petrii, *Pure and Applied Chemistry*, 1991, **63**, 711-734.
3. J. M. Bockris and S. Srinivasan, *Journal of Electroanalytical Chemistry*, 1966, **11**, 350-389.
4. C. C. McCrory, S. Jung, J. C. Peters and T. F. Jaramillo, *Journal of the American Chemical Society*, 2013, **135**, 16977-16987.
